# Supplementary material
Source: PubMed Central journal article supplement (PMC5434766)
Supplement: NIHMS858340-supplement-Supplement.pdf [file NIHMS858340-supplement-Supplement.pdf]

## Supplementary Materials for

### **Nodding syndrome may be an autoimmune reaction to the parasitic worm *Onchocerca volvulus***

Tory P. Johnson, Richa Tyagi, Paul R. Lee, Myoung-Hwa Lee, Kory R. Johnson, Jeffrey Kowalak, Abdel Elkahloun, Marie Medynets, Alina Hategan, Joseph Kubofcik, James Sejvar, Jeffrey Ratto, Sudhir Bunga, Issa Makumbi, Jane R. Aceng, Thomas B. Nutman, Scott F. Dowell, Avindra Nath\*

\*Corresponding author. Email: natha@ninds.nih.gov

Published 15 February 2017, *Sci. Transl. Med.* **9**, eaaf6953 (2017)  
DOI: 10.1126/scitranslmed.aaf6953

#### **This PDF file includes:**

- Fig. S1. Representative image of immunoprecipitation experiments.
- Fig. S2. Subtyping of leiomodins from patients with nodding syndrome.
- Fig. S3. Immunofluorescence of leiomodins-transfected cells with sera from unaffected village controls.
- Fig. S4. Coimmunofluorescence of human neurons with leiomodins and patient CSF.
- Fig. S5. Leiomodins transcripts are expressed in the brain as detected by RNA sequencing.
- Table S1. Proteins with enriched autoantibodies in patients with nodding syndrome.
- Table S2. Top four proteins with enriched autoantibodies in patients with nodding syndrome.
- Table S3. Leiomodins transcripts are expressed in the brain.
- Table S4. Rabbit leiomodins antibodies are neurotoxic.
- Table S5. Antibodies in patient sera are neurotoxic.
- Table S6. Leiomodins antibodies from patients are neurotoxic.
- Table S7. *O. volvulus* proteins identified by mass spectrometry.
- Table S8. Leiomodins antibodies cross-react with *O. volvulus* antigens.

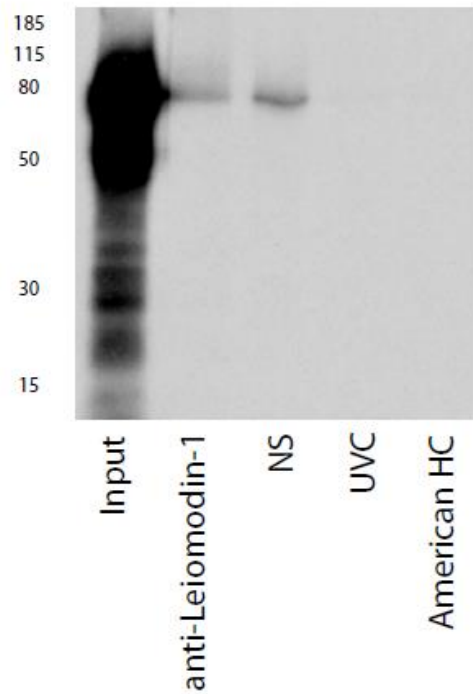

**Fig. S1. Representative image of immunoprecipitation experiments.** Immunoprecipitation of leiomodins-1 IVTT product (input) by rabbit anti-leiomodin-1, sera from a patient with Nodding Syndrome (NS), sera from an unaffected village control (UVC) and an American healthy control (American HC).

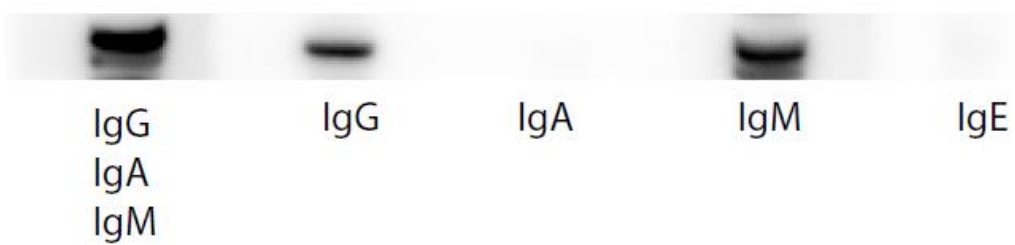

**Fig. S2. Subtyping of leiomodins-1 autoantibodies from patients with nodding syndrome.** Antibodies to leiomodins-1 from patients with NS are IgG and IgM as determined by immunoblot. No IgE or IgA were detected.

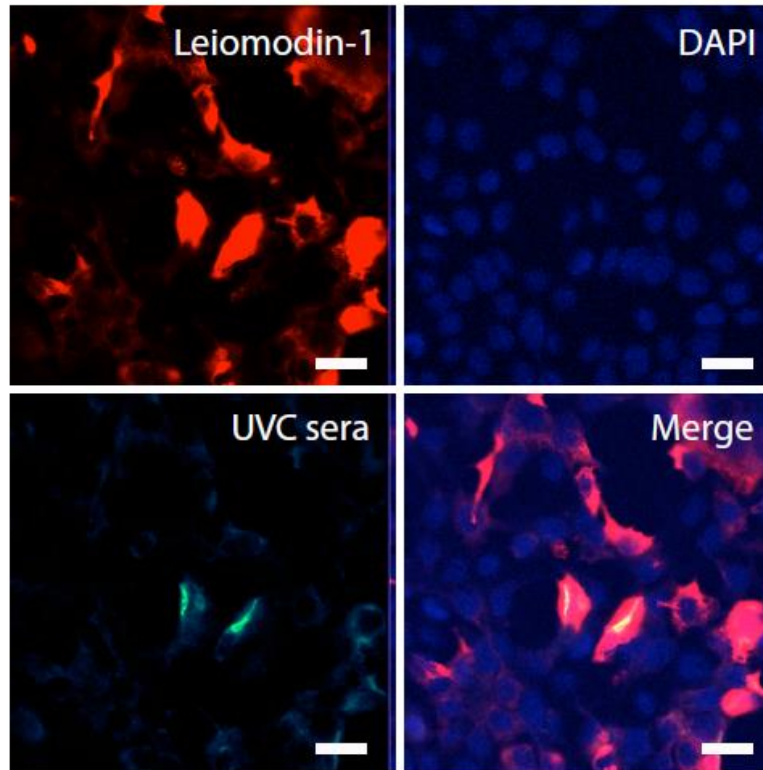

**Fig. S3. Immunofluorescence of leiomodlin-1–transfected cells with sera from unaffected village controls.** Unaffected village control (UVC) sera co-immunostained with leiomodlin-1 (red) on leiomodlin-1 transfected cells show limited reactivity to rare cells (UVC) and no co-labeling of leiomodlin-1 (merge). Nuclei are stained blue with DAPI. Scale bar is 20  $\mu$ M.

A.

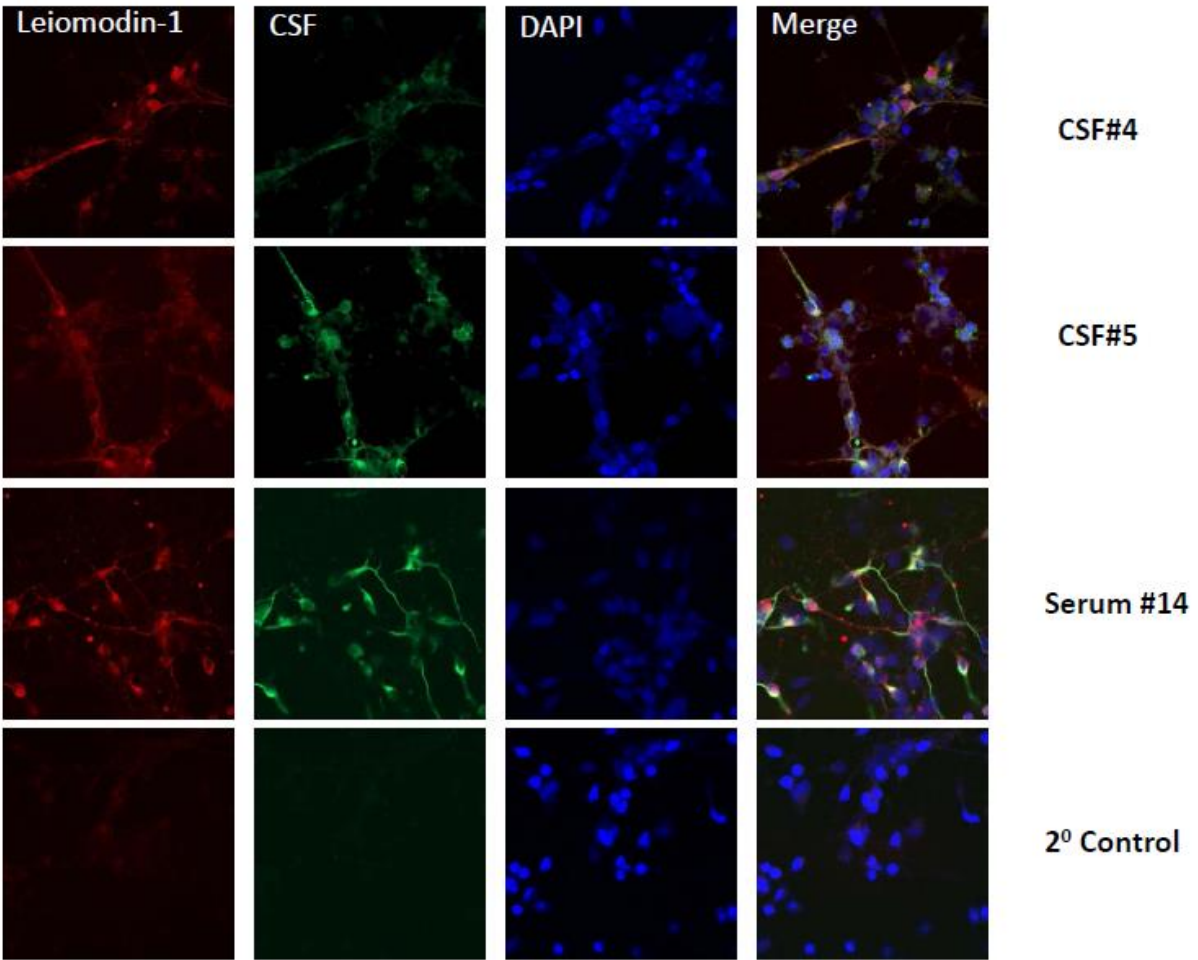

B.

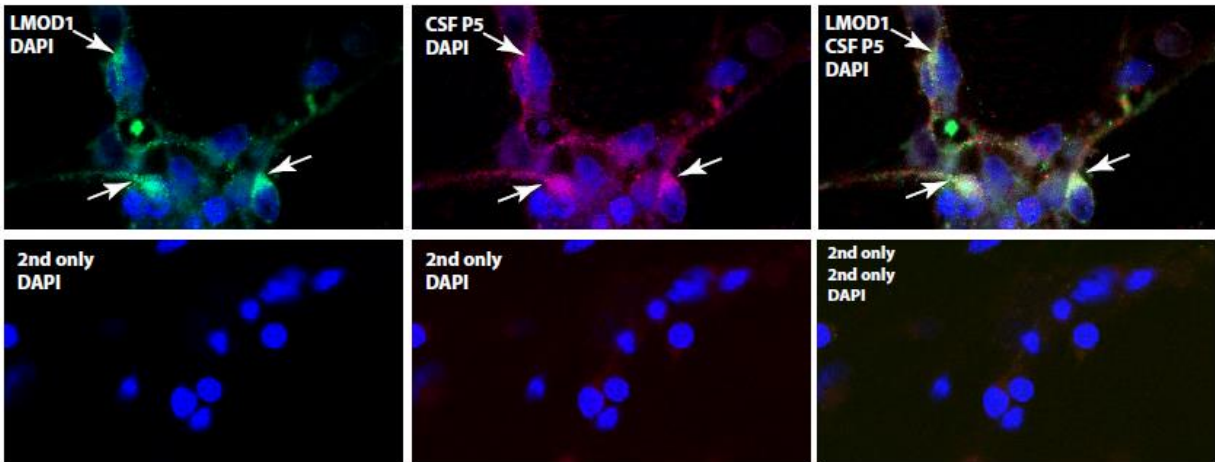

**Fig. S4. Coimmunofluorescence of human neurons with leiomodins-1 and patient CSF.** (A) Human neuronal cultures were fixed with paraformaldehyde, permeabilized with acetone and then immunostained with rabbit polyclonal leiomodins-1 antibody (red) and human CSF from two patients with NS (#4 and #5) (green) or sera from a patient with NS (#14) as a positive control (green). Colocalization of rabbit anti-leiomodin-1 antibodies with antibodies in the CSF or serum in the cytoplasm and neurites was observed. (B) Higher magnification images of patient #5 demonstrate co-localization of CSF from patient with NS and rabbit polyclonal leiomodins-1 antibody in the neuronal cytoplasm (arrow). Secondary antibody controls in A and B show absence of non-specific staining.

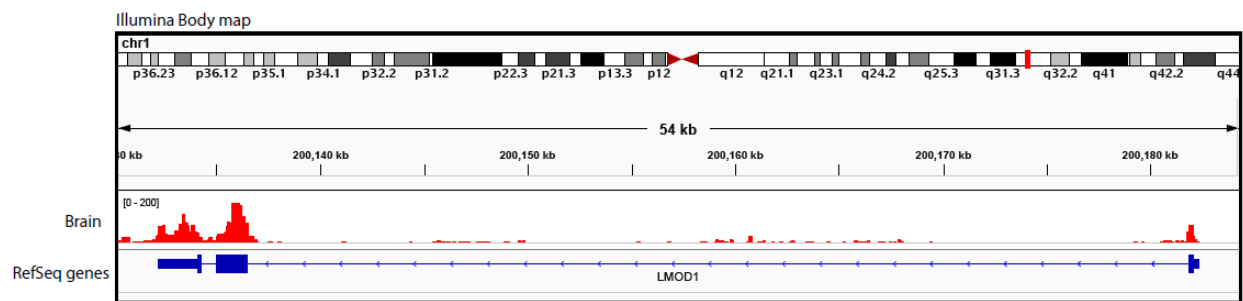

**Fig. S5. Leiomodins-1 transcripts are expressed in the brain as detected by RNA sequencing.** Illumina Body Map 2.0 publically available RNAseq data demonstrated the presence of leiomodins-1 transcripts in the brain. [www.illumina.com/science/data\\_library.ilmn](http://www.illumina.com/science/data_library.ilmn) Data downloaded 7 July, 2013 (37).

**Table S1. Proteins with enriched autoantibodies in patients with nodding syndrome.**

| ID             | Ingenuity Gene Annotation | Fold change disease versus control |
|----------------|---------------------------|------------------------------------|
| BC080187.1     | LMOD1                     | 32649.50                           |
| NM_007262.1    | PARK7                     | 753.14                             |
| BC057779.1     | COX4I2                    | 652.93                             |
| BC098117.1     | C7orf10                   | 155.43                             |
| BC004242.1     | HNRNPUL1                  | 6.77                               |
| NM_001002755.1 | NFU1                      | 5.48                               |
| NM_024821.1    | CCDC134                   | 4.98                               |
| NM_002824.4    | PTMS                      | 4.51                               |
| BC018732.1     | CYB5R1                    | 4.37                               |
| BC007957.1     | DDRKG1                    | 4.29                               |
| NM_001024631.1 | ATXN3                     | 4.11                               |
| NM_001011700.1 | MCCD1                     | 3.82                               |
| BC070290.1     | TRDN                      | 3.82                               |
| BC007872.1     | TK1                       | 3.80                               |
| BC028725.2     | ELMOD1                    | 3.75                               |
| NM_012249.2    | RHOQ                      | 3.55                               |
| NM_022465.2    | IKZF4                     | 3.53                               |
| BC057774.1     | TRMT10B                   | 3.51                               |
| BC010741.1     | TRIT1                     | 3.50                               |
| BC000809.1     | TCEAL1                    | 3.44                               |
| NM_007173.3    | PRSS23                    | 3.33                               |
| BC018206.1     | MZT2A                     | 3.26                               |
| BC017492.1     | COG8                      | 3.25                               |
| NM_020064.2    | BARHL1                    | 3.14                               |
| BC093700.1     | PIN4                      | 3.10                               |
| BC025278.1     | AIG1                      | 3.10                               |
| BC012183.1     | UBQLNL                    | 3.08                               |
| NM_033277.1    | LACRT                     | 3.08                               |
| BC058288.1     | CCDC40                    | 3.08                               |
| NM_012086.1    | GTF3C3                    | 3.08                               |
| BC008374.1     | SH3YL1                    | 3.07                               |
| BC017236.1     | CSNK1G1                   | 2.97                               |
| BC075800.1     | PRKAR2B                   | 2.95                               |
| BC053660.1     | PNPT1                     | 2.94                               |
| NM_004231.2    | ATP6V1F                   | 2.92                               |
| BC013039.1     | GADD45GIP1                | 2.92                               |
| NM_145268.1    | C7orf45                   | 2.85                               |
| BC073866.1     | PRMT6                     | 2.83                               |
| NM_138353.1    | DCAF15                    | 2.81                               |
| BC051688.1     | PNMAL1                    | 2.78                               |
| BC042035.1     | MGC72080                  | 2.75                               |
| NM_006258.1    | PRKG1                     | 2.73                               |
| NM_021244.2    | RRAGD                     | 2.71                               |
| BC048217.1     | SPATA5                    | 2.71                               |
| BC012266.2     | ATG12                     | 2.71                               |

|             |                           |      |
|-------------|---------------------------|------|
| BC011906.1  | ISCU                      | 2.70 |
| BC014051.1  | AIMP1                     | 2.67 |
| NM_002697.2 | POU2F1                    | 2.66 |
| NM_183383.1 | RNF13                     | 2.66 |
| NM_003146.2 | SSRP1                     | 2.66 |
| NM_198287.1 | ING4                      | 2.66 |
| NM_133640.3 | MED22                     | 2.66 |
| NM_007041.2 | ATE1                      | 2.60 |
| NM_000071.1 | CBS                       | 2.60 |
| BC030237.1  | SLC22A18AS                | 2.58 |
| BC040339.1  | NOD1                      | 2.55 |
| BC036450.1  | SAMHD1                    | 2.54 |
| NM_012129.1 | CLDN12                    | 2.51 |
| BC034483.1  | HSPA1L                    | 2.49 |
| NM_206853.1 | QKI                       | 2.47 |
| NM_000403.3 | GALE                      | 2.46 |
| BC014225.2  | HOPX                      | 2.46 |
| NM_000318.1 | PEX2                      | 2.45 |
| BC025263.1  | CDCA4                     | 2.43 |
| NM_024548.2 | CEP97                     | 2.40 |
| BC009614.1  | SPAG16                    | 2.37 |
| BC025930.1  | NPLOC4                    | 2.37 |
| NM_152260.1 | RPUSD2                    | 2.36 |
| BC004407.1  | C9orf64                   | 2.36 |
| NM_153007.3 | ODF4                      | 2.35 |
| BC051843.1  | MAP4                      | 2.34 |
| BC013737.1  | HDAC6                     | 2.33 |
| NM_012110.1 | CHIC2                     | 2.32 |
| NM_152613.1 | WBP2NL                    | 2.31 |
| BC008819.1  | NR1H3                     | 2.31 |
| BC006148.1  | OVOL2                     | 2.29 |
| BC004902.1  | KIAA0947                  | 2.27 |
| BC014095.2  | RELA                      | 2.26 |
| BC056872.1  | NCOA5                     | 2.25 |
| NM_052820.1 | CORO2A                    | 2.25 |
| BC032422.1  | KIR2DL3 (includes others) | 2.23 |
| NM_152261.1 | C12orf23                  | 2.22 |
| BC055427.1  | TNIK                      | 2.22 |
| BC028954.1  | PGBD3                     | 2.22 |
| NM_007019.1 | UBE2C                     | 2.21 |
| BC002555.1  | CLK3                      | 2.19 |
| NM_033064.1 | ATCAY                     | 2.19 |
| NM_006454.2 | MXD4                      | 2.19 |
| NM_005902.1 | SMAD3                     | 2.19 |
| BC050456.1  | THBS4                     | 2.17 |
| NM_022170.1 | EIF4H                     | 2.15 |
| NM_015991.1 | C1QA                      | 2.15 |
| BC008892.1  | ALDH3A1                   | 2.14 |

|                |          |      |
|----------------|----------|------|
| NM_080414.1    | VPS16    | 2.14 |
| NM_017563.1    | IL17RD   | 2.13 |
| NM_005207.1    | CRKL     | 2.13 |
| NM_002143.2    | HPCA     | 2.12 |
| BC065041.1     | PLB1     | 2.12 |
| NM_144602.1    | C16orf78 | 2.12 |
| BC017376.2     | RNF31    | 2.11 |
| BC028206.1     | KIR3DL1  | 2.11 |
| NM_201403.1    | MOB3C    | 2.11 |
| NM_058217.1    | RAD51C   | 2.11 |
| BC024187.2     | DHX40    | 2.10 |
| BC035055.1     | GABRA4   | 2.09 |
| NM_007066.3    | PKIG     | 2.09 |
| NM_174896.2    | C1orf162 | 2.09 |
| NM_174889.2    | NDUFAF2  | 2.08 |
| BC007206.1     | SHD      | 2.08 |
| NM_138612.1    | HAS3     | 2.07 |
| NM_016052.1    | RRP15    | 2.07 |
| NM_014042.1    | ANAPC15  | 2.06 |
| BC022189.2     | C17orf47 | 2.06 |
| BC002758.1     | ADAT1    | 2.06 |
| BC020630.1     | CAMK2N1  | 2.06 |
| NM_002823.2    | PTMA     | 2.05 |
| BC004885.1     | TMEM234  | 2.05 |
| NM_003732.1    | EIF4EBP3 | 2.05 |
| NM_152876.1    | FAS      | 2.05 |
| NM_017952.2    | PTCD3    | 2.04 |
| NM_138430.3    | ADPRHL1  | 2.04 |
| BC032124.1     | BRD3     | 2.04 |
| NM_006998.3    | SCGN     | 2.03 |
| NM_006244.1    | PPP2R5B  | 2.03 |
| BC019015.2     | MED29    | 2.03 |
| NM_014380.1    | NGFRAP1  | 2.02 |
| BC015358.1     | HTATIP2  | 2.02 |
| NM_000810.2    | GABRA5   | 2.02 |
| NM_153236.2    | GIMAP7   | 2.02 |
| BC002704.1     | STAT1    | 2.01 |
| NM_032955.1    | AIF1     | 2.01 |
| BC095406.1     | H2AFY    | 2.00 |
| BC009230.2     | PAGE5    | 2.00 |
| BC016821.1     | MBIP     | 2.00 |
| NM_017971.1    | MRPL20   | 2.00 |
| NM_003085.2    | SNCB     | 2.00 |
| NM_001003937.1 | TSPYL6   | 2.00 |



**Table S2. Top four proteins with enriched autoantibodies in patients with nodding syndrome.**

| Gene ID | Protein name                                     | Function                                 | Fold Change |
|---------|--------------------------------------------------|------------------------------------------|-------------|
| LMOD1   | Leiomodin 1                                      | Actin capping                            | 32649.50    |
| PARK7   | DJ1                                              | Oxidative stress response                | 753.14      |
| COX4I2  | Cytochrome C oxidase subunit 4                   | Terminal enzyme of the mitochondrial ETC | 652.93      |
| C7orf10 | CaiB/baiF CoA-transferase family protein C7orf10 | Unknown, possible transferase            | 155.43      |

**Table S3. Leiomodin-1 transcripts are expressed in the brain.** Data shown are the leiomodin-1 copy number normalized to GAPDH copy number from three independent replicates from figure 2E.

| Sample      | Hela     | NSC      | Neuron   | Brain 1  | Brain 2  | Muscle   |
|-------------|----------|----------|----------|----------|----------|----------|
| Replicate 1 | 7.83E-20 | 1.13E-19 | 3.43E-20 | 2.67E-19 | 3.68E-20 | 8.86E-24 |
| Replicate 2 | 9.17E-08 | 2.3E-07  | 3.11E-07 | 3.51E-06 | 2.89E-05 | 0.000115 |
| Replicate 3 | 1.39E-07 | 3.48E-07 | 7.89E-07 | 6.35E-06 | 5.04E-05 | 0.000463 |

**Table 4. Rabbit leiomodin-1 antibodies are neurotoxic.** Differences in viability of neurons treated with rabbit anti-leiomodin-1, normal rabbit sera or saponin. Data shown are percent viability from cells from Fig 3A.

| Well # | Rabbit anti-leiomodin-1 | Normal rabbit sera | Saponin |
|--------|-------------------------|--------------------|---------|
| 1      | 62.28                   | 30.39              | 32.28   |
| 2      | 72.61                   | 34.91              | 37.13   |
| 3      | 66.94                   | 32.72              | 35.56   |
| 4      | 60.32                   | 32.05              | 34.23   |
| 5      | 59.77                   | 31.85              | 33.34   |
| 6      | 90.23                   | 52.34              | 50.94   |
| 7      | 87.56                   | 52.70              | 51.18   |
| 8      | 83.39                   | 48.01              | 46.87   |
| 9      | 78.88                   | 46.59              | 46.28   |
| 10     | 92.75                   | 48.37              | 50.55   |

**Table S5. Antibodies in patient sera are neurotoxic.** Differences in viability of neurons treated with either sera or antibody depleted sera from a single patient with NS. Data shown are percent viability from cells from Fig 3B.

| Well # | Patient sera #1 | Antibody depleted patient sera |
|--------|-----------------|--------------------------------|
| 1      | 12.93           | 64.57                          |
| 2      | 15.03           | 67.93                          |
| 3      | 15.12           | 74.39                          |
| 4      | 15.19           | 90.7                           |
| 5      | 15.2            | 92.13                          |

**Table S6. Leiomodin-1 antibodies from patients are neurotoxic.** Differences in toxicity of patient sera or patient sera selectively depleted of leiomodin-1 auto-antibodies. Data shown are percent toxicity from cells from Fig 3C.

| Patient ID # | Sera  | Leiomodin-1 antibody depleted sera |
|--------------|-------|------------------------------------|
| 1            | 68.87 | 45.68                              |
| 4            | 79.1  | 54.33                              |
| 10           | 32.54 | 17.95                              |
| 17           | 30.34 | 14.68                              |

**Table S7. *O. volvulus* proteins identified by mass spectrometry.**

| Accession number | Entry name   | Protein name                                                      |
|------------------|--------------|-------------------------------------------------------------------|
| P30162           | ACT1_ONCVO   | Actin-1                                                           |
| J0DN48           | J0DN48_LOALO | Glyceraldehyde-3-phosphate dehydrogenase                          |
| P46434           | GST1_ONCVO   | Glutathione S-transferase 1                                       |
| O18532           | O18532_ONCVO | 22 upper                                                          |
| O44941           | O44941_ONCVO | Peroxidoxin-2                                                     |
| O16006           | O16006_DIRIM | Peroxidoxin-1                                                     |
| O46147           | O46147_ONCVO | Putative heparan sulfate                                          |
| O96906           | O96906_ONCVO | Aspartic protease                                                 |
| Q25597           | Q25597_ONCVO | Beta-galactoside-binding lectin                                   |
| Q7YZX3           | Q7YZX3_ONCVO | Enolase                                                           |
| A8PFE3           | A8PFE3_BRUMA | Enolase, putative                                                 |
| Q95W51           | Q95W51_ONCVO | Prolyl-4-hydroxylase alpha subunit-like protein                   |
| Q9U9R9           | Q9U9R9_ONCVO | Fructose-bisphosphatealdolase                                     |
| Q25632           | TPM_ONCVO    | Tropomyosin                                                       |
| P11503           | HSP70_ONCVO  | Heat shock 70 kDa protein                                         |
| Q26357           | Q26357_ONCVO | Heat shock 70 kDa protein                                         |
| P27541           | HSP70_BRUMA  | Heat shock 70 kDa protein                                         |
| J9FG14           | J9FG14_WUCBA | Heat shock 70 protein                                             |
| H2B652           | H2B652_9MAXI | Heat shock protein 70                                             |
| Q0RAH1           | Q0RAH1_ONCVE | 60 kDachaperonin                                                  |
| P29691           | EF2_CAEEL    | Elongation factor 2                                               |
| A8PJV1           | A8PJV1_BRUMA | Translation elongation factor aEF-2, putative                     |
| Q54NB6           | FKBP4_DICDI  | FK506-binding protein 4                                           |
| A8QHE7           | A8QHE7_BRUMA | FKBP-type peptidyl-prolylcis-trans isomerase-59, BmFKBP59         |
| A8P3D2           | A8P3D2_BRUMA | Glycosyl hydrolase family 20, catalytic domain containing protein |
| A8PGN9           | A8PGN9_BRUMA | Glycosyl hydrolases family 18 protein                             |
| A8NGD6           | A8NGD6_BRUMA | Phosphoglycerate kinase                                           |
| F1L2P3           | F1L2P3_ASCSU | Phosphoglycerate kinase                                           |
| A8QGN5           | A8QGN5_BRUMA | TPR Domain                                                        |
| A0B5P0           | SYR_METTP    | Arginine--tRNA ligase                                             |
| A9H9A8           | ATPB_GLU DA  | ATP synthase subunit beta                                         |
| E1FVE7           | E1FVE7_LOALO | Branched-chain-amino-acid aminotransferase                        |
| G0P5J3           | G0P5J3_CAEBE | CBN-EGL-30 protein                                                |
| B8FUN4           | DNAK_DESHD   | Chaperone protein DnaK                                            |
| E1FT93           | E1FT93_LOALO | Intermediate filament protein B                                   |
| Q1NJR3           | Q1NJR3_9DELT | Mannosyl-glycoprotein endo-beta-N-                                |

|        |              |                                                 |
|--------|--------------|-------------------------------------------------|
|        |              | acetylglucosamidase                             |
| J9EH08 | J9EH08_WUCBA | MFP2 family protein                             |
| J9EW18 | J9EW18_WUCBA | Phosphoenolpyruvatecarboxykinase                |
| J0DMD4 | J0DMD4_LOALO | Pseudouridine synthase                          |
| E1GL29 | E1GL29_LOALO | Sodium/potassium ATPase subunit beta            |
| E1FQ19 | E1FQ19_LOALO | TAG-320 protein                                 |
| Q17172 | TDX2_BRUMA   | Thioredoxin peroxidase 2                        |
| Q87QI7 | TORA_VIBPA   | Trimethylamine-N-oxide reductase                |
| P23232 | GBB_LOLFO    | Guanine nucleotide-binding protein subunit beta |
| A8Q0T1 | A8Q0T1_BRUMA | Disorganized muscle protein 1, putative         |

**Table S8. Leiomodrin-1 antibodies cross-react with *O. volvulus* antigens.** Differences in immune reactivity of leiomodrin-1 antibodies competed with BSA or *Onchocerca volvulus* whole-cell lysates to immobilized leiomodrin-1. Optical density for each immune reactivity is provided for data from Fig 4E.

| Patient ID # | BSA competed | <i>O. volvulus</i> competed |
|--------------|--------------|-----------------------------|
| 3            | 108.87       | 85.930                      |
| 14           | 154.48       | 11.280                      |
| 20           | 364.22       | 14.110                      |
| 16           | 319.05       | 201.890                     |
